# Supplementary material for: Effects of ADMA on gene expression and metabolism in serum-starved LoVo cells
Source: PubMed Central journal article supplement (PMC4867623; doi:10.1038/srep25892), 2016-05-16

Title page of supplementary information

## **Effects of ADMA on gene expression and metabolism in serum-starved**

### **LoVo cells**

Ningning Zheng, Ke Wang, Jiaojiao He, Yunping Qiu, Guoxiang Xie,

Mingming Su, Wei Jia, Houkai Li

**Table S1.** The complete enriched GO terms of regulated genes by serum starvation.

**Table S2.** The ADMA regulated genes at 96 h compared to serum-starved cells

**Figure S1.** Cluster of differentially expressed genes by ADMA compared to serum starvation using the unsupervised hierarchical clustering method. C represents control group; SS represents 96h serum starvation group; 10 $\mu$ M ADMA for 96h in serum starvation medium.

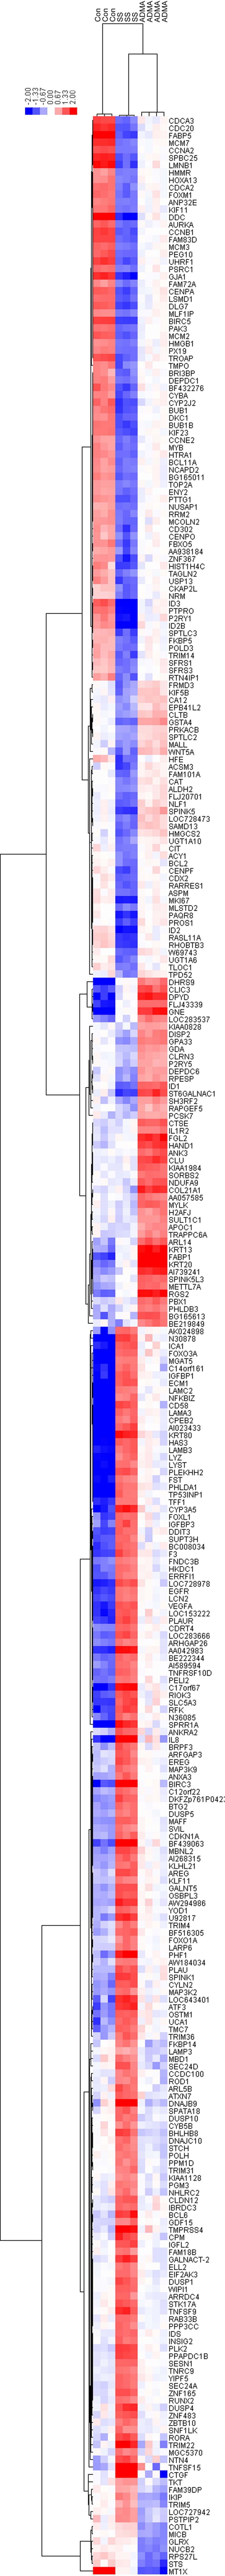

Supplement: srep25892-s1.pdf [file srep25892-s1.pdf]
